# Supplementary material
Source: MDPI journal article supplement (https://www.mdpi.com/2673-7272/4/2/24)
Supplement: s1 [file s1]

## Supplemental File

**Table S1.** Sample Fitness Test/Assessment.

| Test                                  | Measuring           | Notes                                                                                                                                                                                                                                                                                                                                                                                                                                                |
|---------------------------------------|---------------------|------------------------------------------------------------------------------------------------------------------------------------------------------------------------------------------------------------------------------------------------------------------------------------------------------------------------------------------------------------------------------------------------------------------------------------------------------|
| 6 minute walk/run test                | Aerobic capacity    | <ul style="list-style-type: none"> <li>• Run/walk as far as possible in 6 minutes</li> <li>• Participant can do this on their own time and send you the results</li> <li>• Easy to do at home, a track, treadmill or free app can be used to track the distance travelled</li> </ul>                                                                                                                                                                 |
| 3 minute step-up test                 | Aerobic Capacity    | <ul style="list-style-type: none"> <li>• An alternative for the 6 minute walk/run test that can be completed indoors</li> <li>• Step up onto a single step and then back down repeatedly for 3 minutes</li> <li>• Take pulse immediately after completing the exercise for 1 minute (determine bpm)</li> <li>• Results are relative to the individual but provides a good indication of aerobic fitness and can be used to track progress</li> </ul> |
| Maximum plank hold                    | Core strength       | <ul style="list-style-type: none"> <li>• One of the most important functional muscle groups <ul style="list-style-type: none"> <li>• Can help to set goals to increase strength</li> <li>• Ensure that they are maintaining proper form</li> </ul> </li> </ul>                                                                                                                                                                                       |
| Maximum push-ups (1 minute)           | Upper body strength | <ul style="list-style-type: none"> <li>• Can perform a push-up variation such as against a wall, from the knees or from the toes</li> <li>• Make sure to note the variation used for consistency in the post-test</li> </ul>                                                                                                                                                                                                                         |
| Maximum body weight squats (1 minute) | Lower body strength | <ul style="list-style-type: none"> <li>• Can perform a variation such as with a chair or half squat depending on what difficulty is appropriate</li> <li>• Make sure to note the variation used for consistency in the post-test</li> </ul>                                                                                                                                                                                                          |
| Double and single leg balance testing | Balance             | <ul style="list-style-type: none"> <li>• Not necessary but could be relevant if balance is an area of concern or something that the participant is looking to improve</li> </ul>                                                                                                                                                                                                                                                                     |

Figure S1. Sample Exercise Prescription.

| Warm up → 4-8 mins                                                                  |  |                                                                                                                                                                                                                                                                                                                            |
|-------------------------------------------------------------------------------------|--|----------------------------------------------------------------------------------------------------------------------------------------------------------------------------------------------------------------------------------------------------------------------------------------------------------------------------|
| <b>Jog on spot →</b>                                                                |  |                                                                                                                                                                                                                                                                                                                            |
|    |  | 1-2 mins<br><b>Instructions</b> <ul style="list-style-type: none"> <li>• Jog on the spot</li> <li>• Incorporate front air punches</li> <li>• Incorporate overhead air punches</li> <li>• Mix it up during the 1-2 mins</li> </ul>                                                                                          |
| <b>Lateral side shuffle →</b>                                                       |  |                                                                                                                                                                                                                                                                                                                            |
|    |  | 1-2 mins<br><b>Instructions</b> <ul style="list-style-type: none"> <li>• Take 2 steps to one side and touch the ground with the opposite arm</li> <li>• Repeat for other side</li> <li>• Complete as many side-to-side repetitions as possible</li> </ul>                                                                  |
| <b>Elastic band reverse fly →</b>                                                   |  |                                                                                                                                                                                                                                                                                                                            |
|  |  | 1-2 mins<br><b>Instructions</b> <ul style="list-style-type: none"> <li>• Hold elastic band out in front of you with both hands and pull apart to open chest</li> <li>• Repeat this motion overhead</li> <li>• Mix it up during the 1-2 mins</li> </ul>                                                                     |
| <b>Modified jumping jacks →</b>                                                     |  |                                                                                                                                                                                                                                                                                                                            |
|  |  | 1-2 mins<br><b>Instructions</b> <ul style="list-style-type: none"> <li>• Step from side to side while raising arms above head for each step</li> </ul> <div> <b>Tips</b> <ul style="list-style-type: none"> <li>• Self-challenge: -Try regular jumping jacks (both feet off the ground at the same time)</li> </ul> </div> |

## Work out → 15 mins

### Hip extension & abduction →

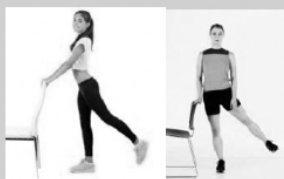

1 set of 10 repetitions per exercise (1 x 10)

#### Instructions

- Hip extension: kick each leg backward 10 times while holding onto a chair/wall
- Hip abduction: kick each leg sideways 10 times while holding onto a chair/wall

#### Tips

- Keep abs tightened
- Do not compensate by leaning to one side
- Self-challenge: -Try with ankle weights

### Chicken wing →

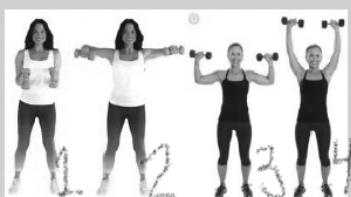

1 x 10

#### Instructions

- Starting with arms bent at 90 degrees (step 1), spread arms out to side (step 2), rotate arms upward (step 3), shoulder press (step 4)
- Complete all steps in one fluid motion

#### Tips

- Can be done with or without weights
- Self-challenge: -Increase the weight

### Bicep curls →

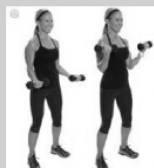

1 x 10

#### Instructions

- Start with arms stretched out at sides and bend elbows to bring hands to shoulders
- On descent of hands, rotate forearms inward

#### Tips

- Can be done with or without weights
- If feeling pain: - Curl one arm at a time

### Plank →

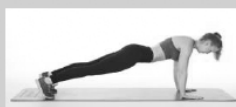

2 x 30 seconds

#### Instructions

- When in this position, squeeze glutes, abs, and take deep breaths
- Keep back and legs aligned

#### Tips

- If feeling pain:
- Hold weights that grip to floor to reduce pain or discomfort in wrists

### Triceps curl →

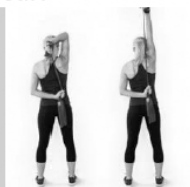

1 x 10

#### Instructions

- Hold elastic band with one hand behind back and pull up behind head with other arm
- Switch between arms (10 for each arm)

#### Tips

- Squeeze abs (engage core) so that back does not arch
- Variation: -Triceps kickbacks with weight

### Knee cross crunch →

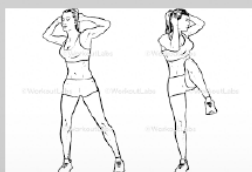

2 x 8

#### Instructions

- In standing position, bring elbow to opposite knee
- Switch between sides (8 each side)

#### Tips

- Squeeze abs (engage core)

**Cool down → 5-10 mins**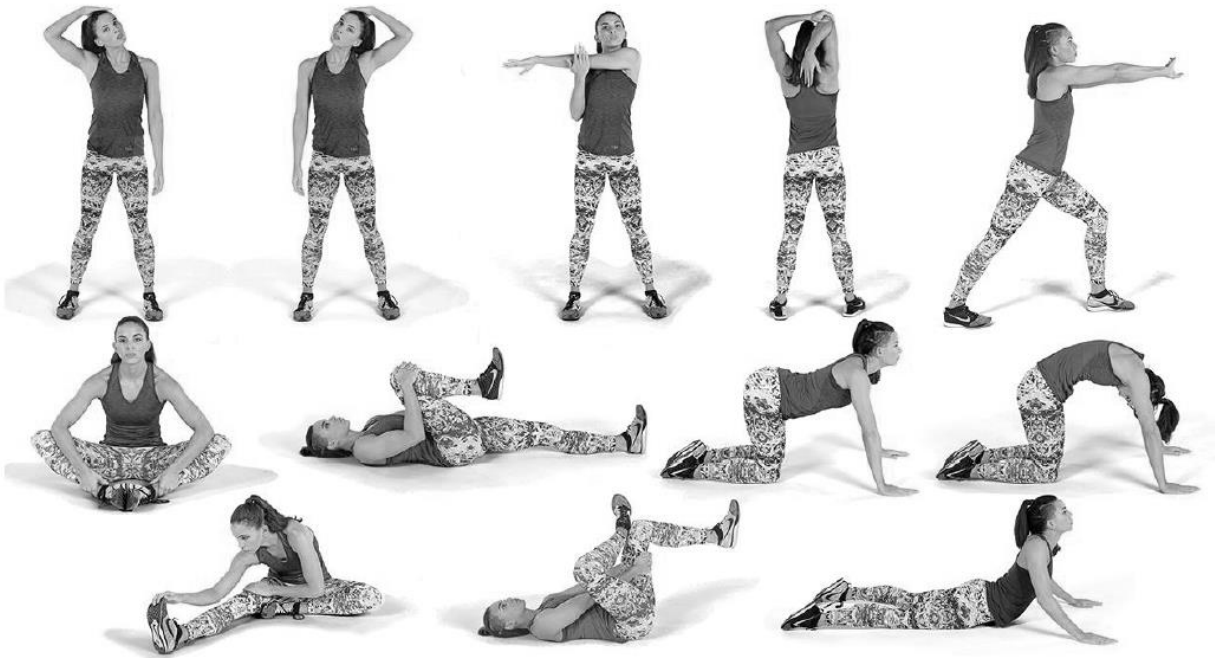

- Feel free to add any other stretch that relieves joints of stiffness.
- Hold each stretch for 15-30 seconds.
- Make sure to stretch both left and right sides of each movement.
